# Supplementary material for: Dynamic Analysis of Metabolic Response in Gastric Ulcer (GU) Rats with Electroacupuncture Treatment Using 1H NMR-Based Metabolomics
Source: PubMed Central journal article supplement (PMC6501414; doi:10.1155/2019/1291427), 2019-04-22
Supplement: 1291427.f1.pdf [file 1291427.f1.pdf]

# Dynamic analysis of metabolic response in gastric ulcer (GU) rats with electro-acupuncture treatment using $^1\text{H}$ NMR-based metabolomics

Jia-cheng Shen<sup>1</sup>, Lin-yu Lian<sup>1,2†</sup>, Yuan Zhang<sup>1,3</sup>, Qi-da He<sup>1,2</sup>, Jiao-long Chen<sup>1,2</sup>, Long-bin Zhang<sup>1</sup>, Miao-sen Huang<sup>1,2</sup>, Mi Liu<sup>3</sup>, Lin-chao Qian<sup>1\*</sup>, Cai-chun Liu<sup>1\*</sup>, Zong-bao Yang<sup>1\*</sup>

<sup>1</sup>Department of Traditional Chinese Medicine and Shenzhen Research Institute, Xiamen University, Xiamen 361005, China

<sup>2</sup> College of Acupuncture and Moxibustion, Fujian university of Traditional Chinese Medicine, Fuzhou 350122, China

<sup>3</sup> College of Acupuncture and Moxibustion, Hunan university of Traditional Chinese Medicine, Changsha 410208, China

Correspondence should be addressed to Zong-bao Yang, yzbdq@163.com and Caichun Liu, caichunliu714@gmail.com.

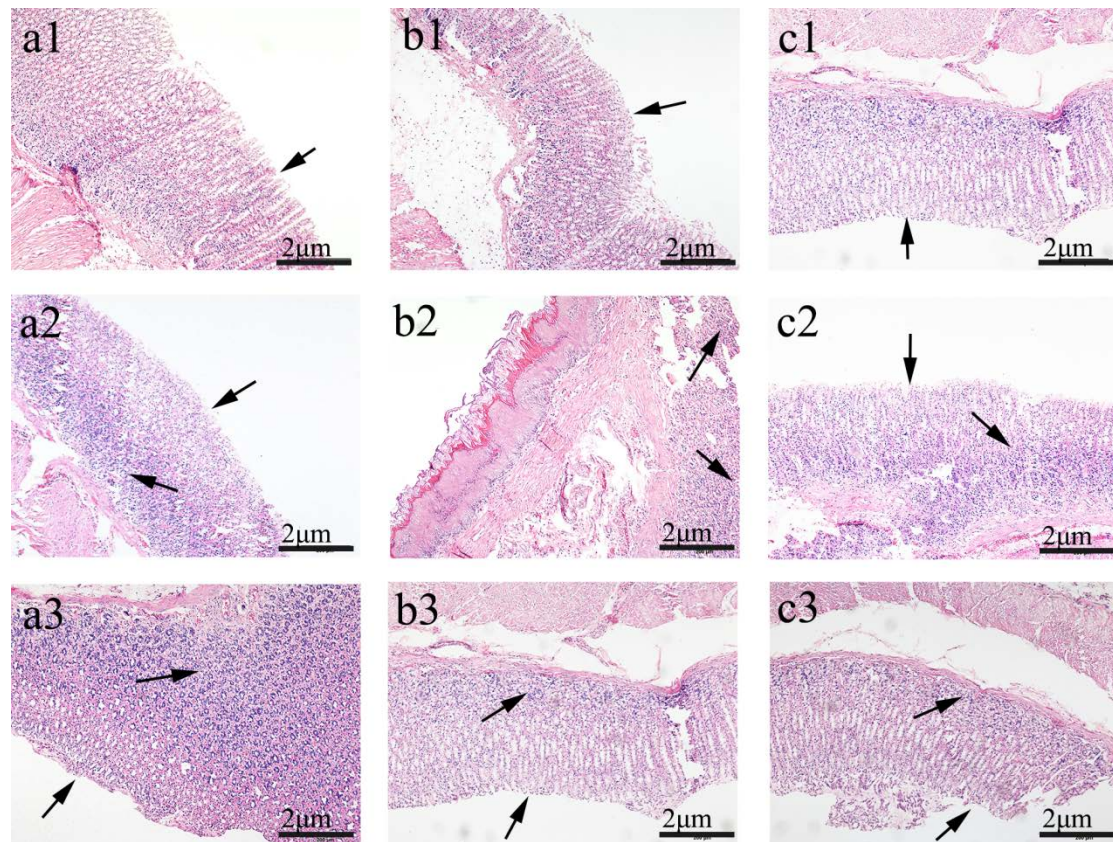

**Fig.S1** Histological examination of gastric mucosa from all groups.(a1, a2 and a3, rats in control group, GU model group and electro-acupuncture at 1day; b1, b2 and b3, rats in control group, GU model group and electro-acupuncture at 4days; c1, c2 and c3, rats in control group, GU model



M2 and EA2 group (B1); stomach of rats in M3 and EA3 group (C1); liver of rats in M1 and EA1 group (A2); liver of rats in M2 and EA2 group (B2); liver of rats in M3 and EA3 group (C2); kidney of rats in M1 and EA1 group (A3); kidney of rats in M2 and EA2 group (B3); kidney of rats in M3 and EA3 group (C3).

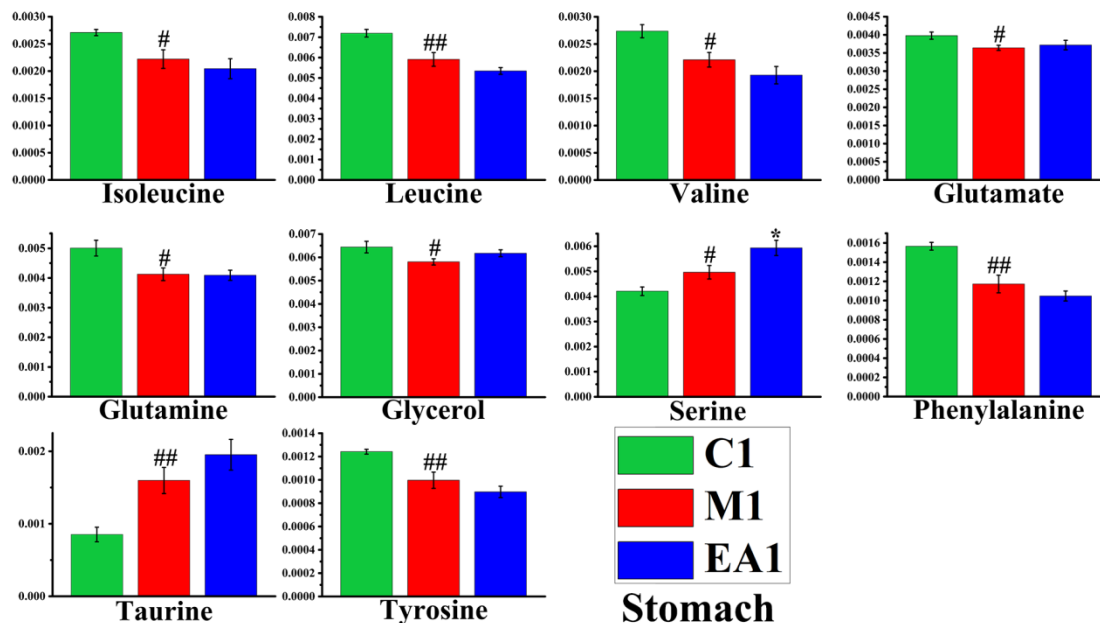

**Fig.S4** Relative abundance (mean ± S.D.) of characteristic metabolites from gastric tissues of rats in C1, M1 and EA1 group.

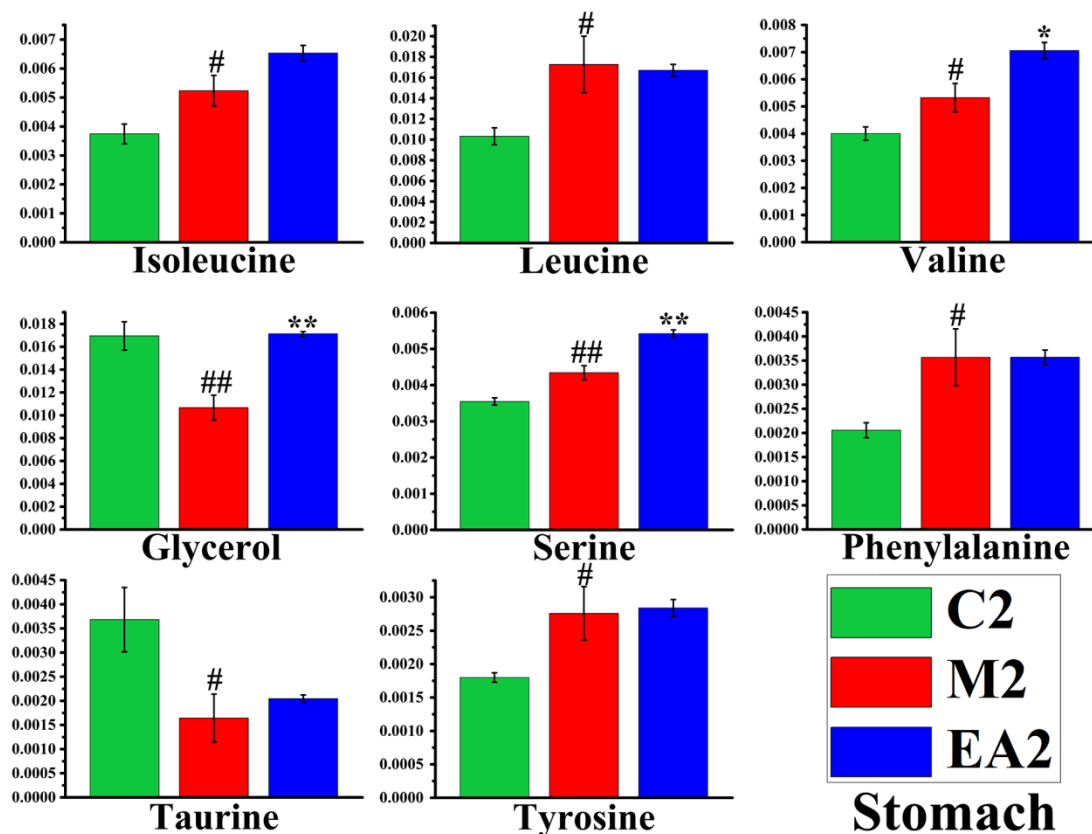

**Fig.S5** Relative abundance (mean  $\pm$  S.D.) of characteristic metabolites from gastric tissues of rats in C2, M2 and EA2 group.

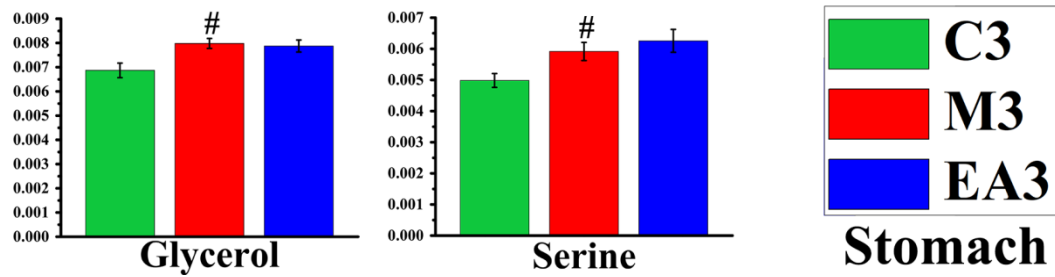

**Fig.S6** Relative abundance (mean  $\pm$  S.D.) of characteristic metabolites from gastric tissues of rats in C3, M3 and EA3 group..

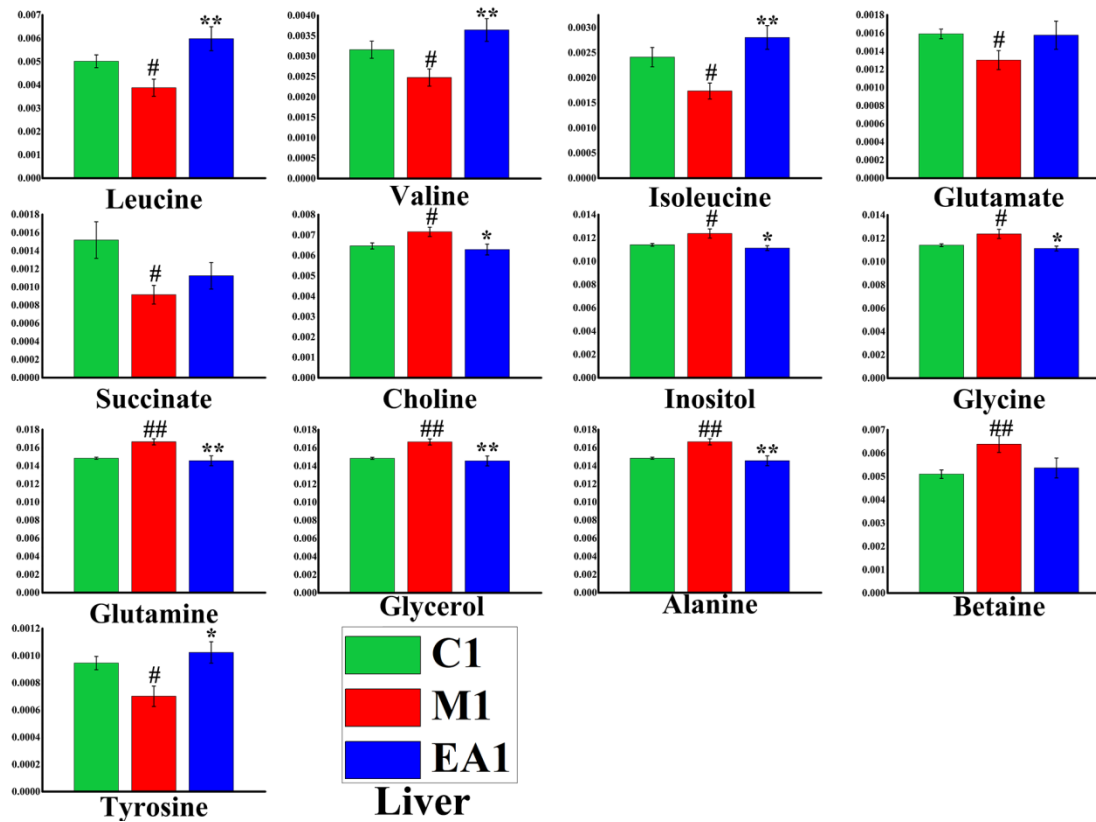

**Fig.S7** Relative abundance (mean  $\pm$  S.D.) of characteristic metabolites from liver tissues of rats in C1, M1 and EA1 group.

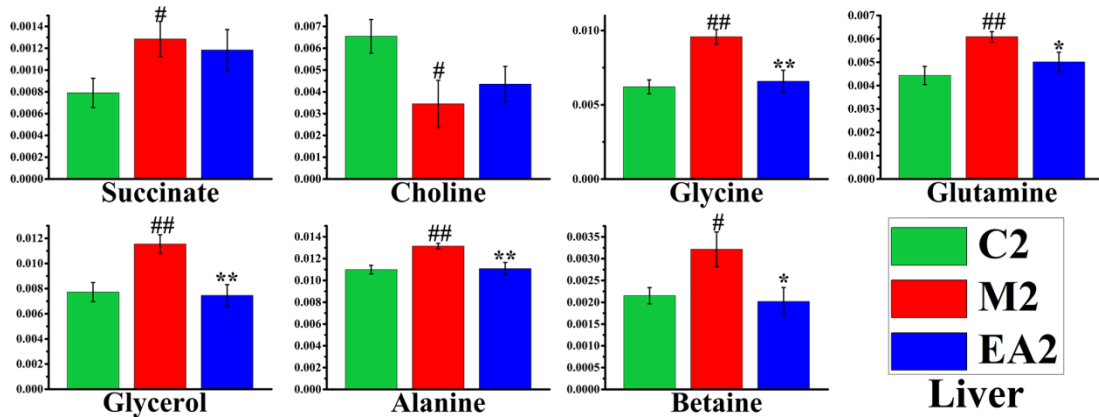

**Fig.S8** Relative abundance (mean  $\pm$  S.D.) of characteristic metabolites from liver tissues of rats in C2, M2 and EA2 group.

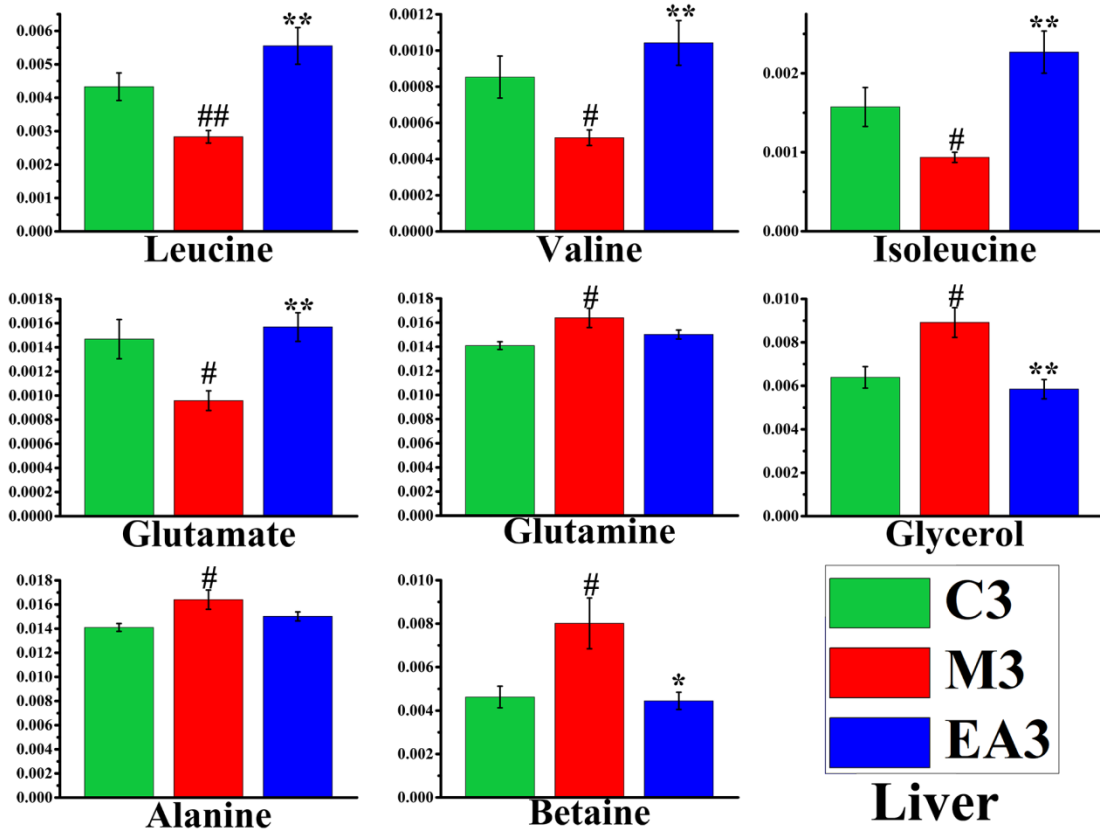

**Fig.S9** Relative abundance (mean  $\pm$  S.D.) of characteristic metabolites from liver tissues of rats in C3, M3 and EA3 group.

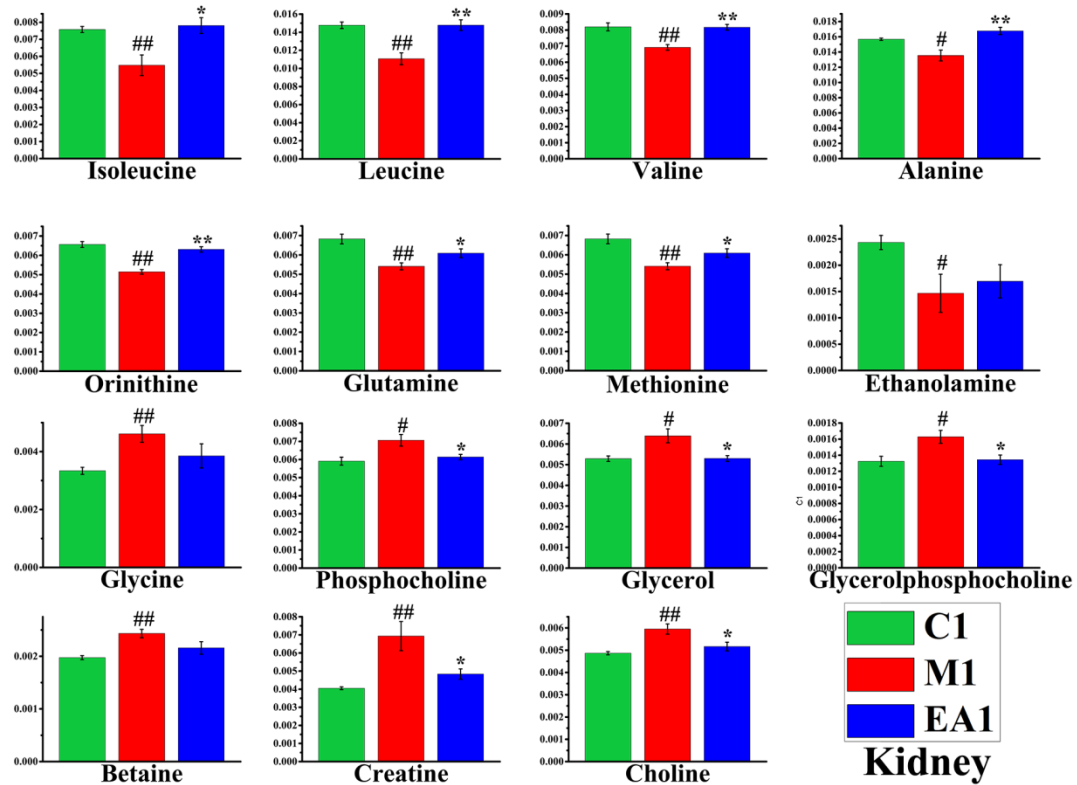

**Fig.S10** Relative abundance (mean  $\pm$  S.D.) of characteristic metabolites from kidney tissues of rats in C1, M1 and EA1 group.

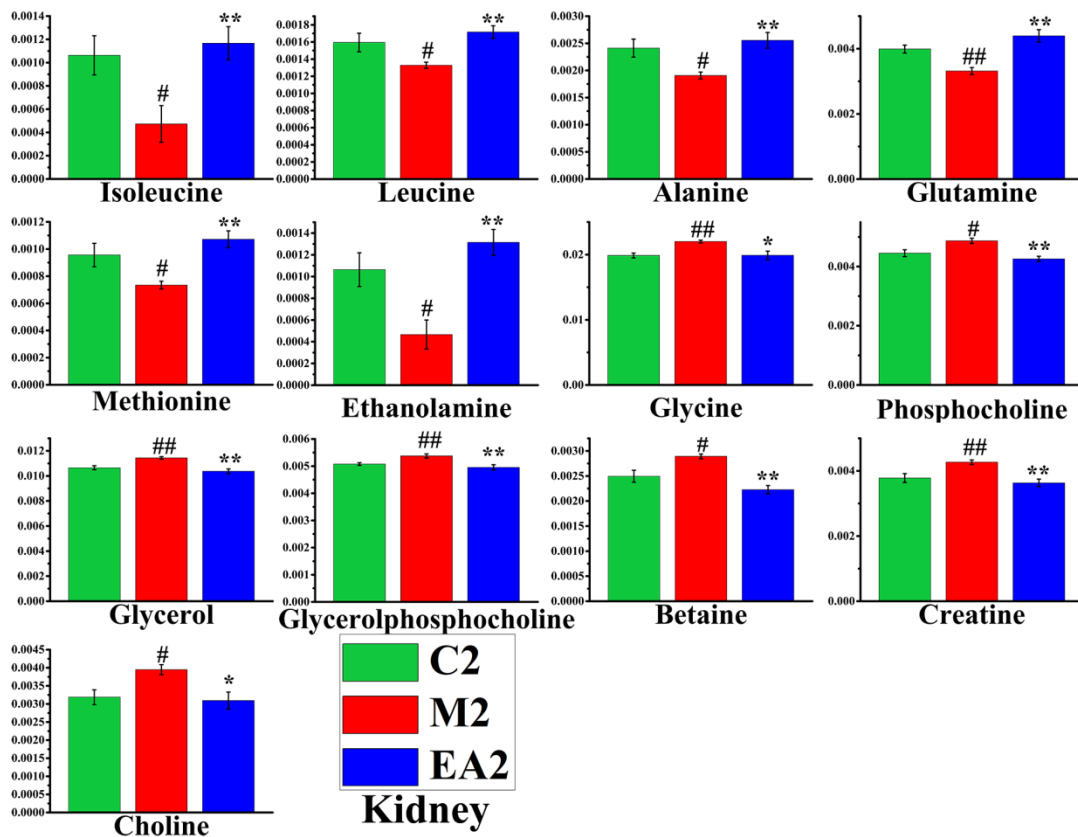

**Fig.S11** Relative abundance (mean  $\pm$  S.D.) of characteristic metabolites from kidney tissues of rats in C2, M2 and EA2 group.

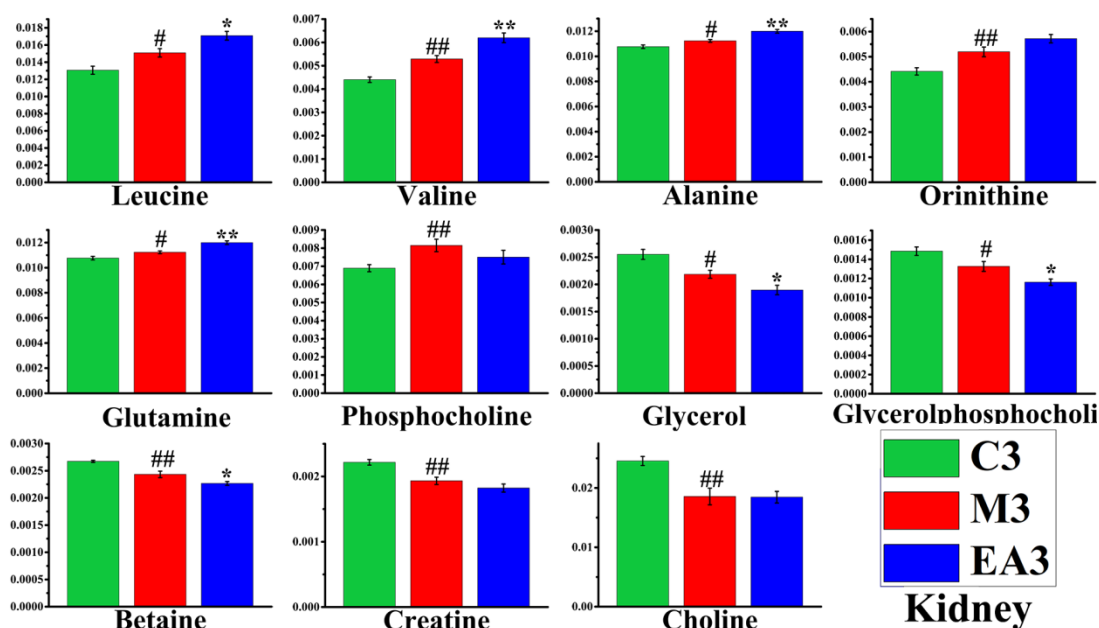

**Fig.S12** Relative abundance (mean  $\pm$  S.D.) of characteristic metabolites from kidney tissues of rats in C3, M3 and EA3 group.

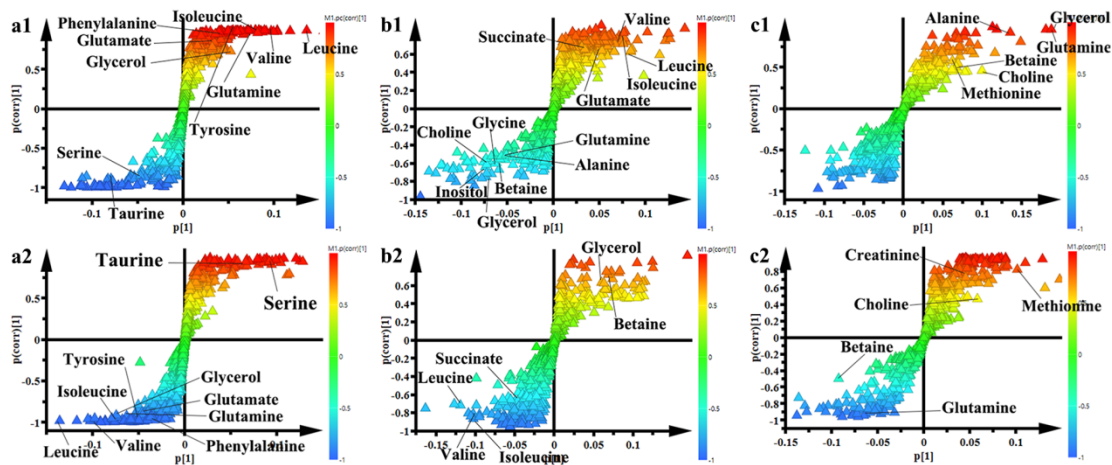

**Fig.S13** Corresponding S-plots from stomach of rats in M1 and EA1 group (A); stomach of rats in M2 and EA2 group (B1); stomach of rats in M3 and EA3 group (C1); liver of rats in M1 and EA1 group (A2); liver of rats in M2 and EA2 group (B2); liver of rats in M3 and EA3 group (C2); kidney of rats in M1 and EA1 group (A3); kidney of rats in M2 and EA2 group (B3); kidney of rats in M3 and EA3 group (C3).

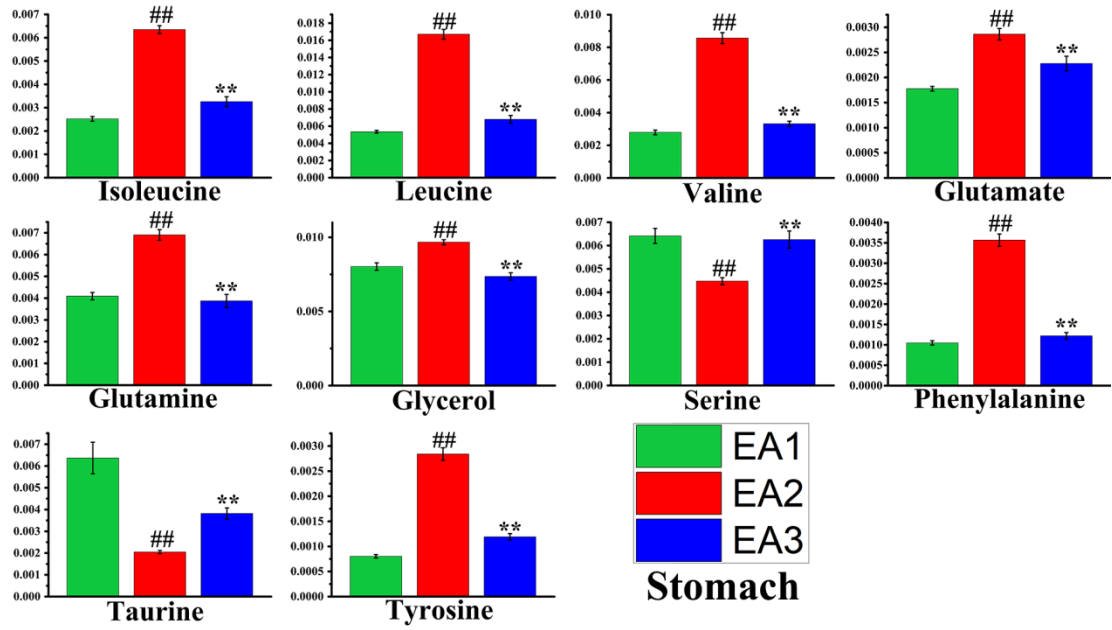

**Fig.S14** Relative abundance (mean  $\pm$  S.D.) of characteristic metabolites from gastric tissues of rats in EA1, EA2 and EA3 group.

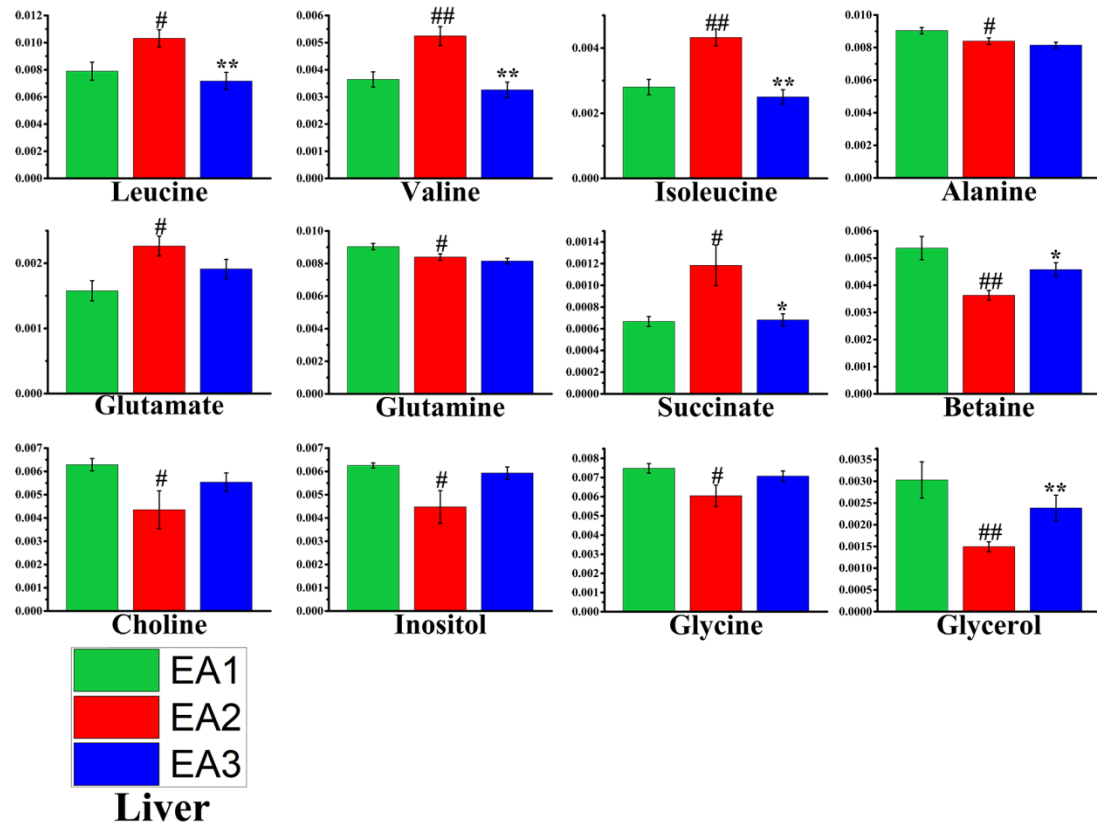

**Fig.S15** Relative abundance (mean  $\pm$  S.D.) of characteristic metabolites from liver tissues of rats in EA1, EA2 and EA3 group.



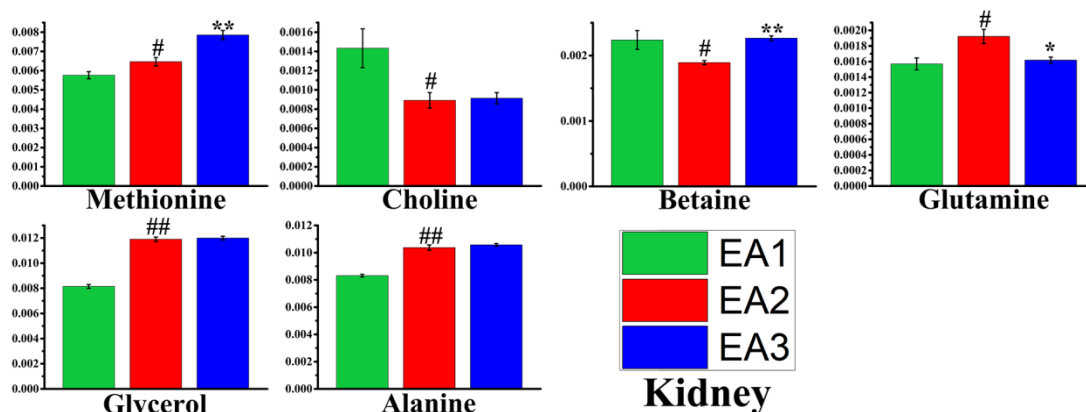

**Fig.S16** Relative abundance (mean  $\pm$  S.D.) of characteristic metabolites from kidney tissues of rats in EA1, EA2 and EA3 group.

**Table S1** Peak attribution of the main marked metabolites in  $^1\text{H-NMR}$  spectra of stomach sample

| NO. | Metabolites           | $\delta\text{1H/ppm}$     | Moieties                                                |
|-----|-----------------------|---------------------------|---------------------------------------------------------|
| 1   | Isoleucine            | 0.94(t); 1.01(d)          | $\delta$ -CH <sub>3</sub> ; $\beta$ -CH <sub>3</sub>    |
| 2   | Leucine               | 0.96(t); 1.70(m)          | CH <sub>3</sub> ; CH <sub>2</sub> & $\gamma$ -CH        |
| 3   | Valine                | 0.99(d); 1.04(d)          | $\gamma$ -CH <sub>3</sub> ; $\gamma$ -CH <sub>3</sub>   |
| 4   | 3-Hydroxybutyrate     | 1.21(d)                   | $\gamma$ CH <sub>3</sub> COSY                           |
| 5   | Methylmalonate        | 1.23(d)                   | CH <sub>3</sub>                                         |
| 6   | Lactate               | 1.33(d); 4.11(q)          | CH <sub>3</sub> ; CH                                    |
| 7   | Alanine               | 1.48(d); 3.78(q)          | CH <sub>3</sub> ; CH                                    |
| 8   | Lysine                | 1.73(m); 1.91(m)          | $\beta$ CH <sub>2</sub> , $\delta$ CH <sub>2</sub>      |
| 10  | Acetate               | 1.92(s)                   | CH <sub>3</sub>                                         |
| 11  | Glutamate             | 2.05(m)                   | $\beta$ -CH                                             |
| 12  | Glutamine             | 2.14(m)                   | $\beta$ -CH <sub>2</sub>                                |
| 14  | Glutathione           | 2.17(m); 2.55(m)          | $\beta$ -CH <sub>2</sub> ; $\gamma$ -CH <sub>2</sub>    |
| 15  | Succinate             | 2.41(s)                   | CH                                                      |
| 17  | Aspartate             | 2.69(dd); 2.82(dd)        | $\beta$ CH <sub>2</sub> ; $\beta$ CH <sub>2</sub>       |
| 19  | Methylguanidine       | 2.86(s) 3.38(s)           |                                                         |
| 21  | Asparagine            | 2.88(dd); 2.96(dd)        | $\beta$ CH <sub>2</sub> ; $\beta$ CH <sub>2</sub>       |
| 22  | Creatine              | 3.04(s); 3.94(s)          | CH <sub>3</sub> , CH <sub>2</sub>                       |
| 23  | Creatinine            | 3.05(s)                   | CH <sub>3</sub>                                         |
| 24  | Ethanolamine          | 3.15(t) 3.84(t)           | CH <sub>2</sub> NH <sub>2</sub> ; CH <sub>2</sub> OH    |
| 25  | Choline               | 3.20(s); 3.52(m); 4.07(m) | CH <sub>3</sub> ; N-CH <sub>2</sub> ; O-CH <sub>2</sub> |
| 26  | Phosphocholine        | 3.22(s); 3.59(m); 4.17(m) | CH <sub>3</sub> ; N-CH <sub>2</sub> ; O-CH <sub>2</sub> |
| 28  | Glycerophosphocholine | 3.23(s); 3.96(m)          | CH <sub>3</sub> ; CH&O-CH <sub>2</sub>                  |
| 29  | Acetylcholine         | 3.24(s)                   |                                                         |
| 30  | Betaine               | 3.27(s); 3.89(s)          | CH <sub>3</sub> ; CH <sub>2</sub>                       |
| 32  | Taurine               | 3.27(t); 3.42(t)          | S-CH <sub>2</sub> ; N-CH <sub>2</sub>                   |
| 33  | Inosine               | 4.28(dd); 8.22(s)         | CH(5); N-CH=N                                           |
| 34  | Methanol              | 3.36(s)                   | 28                                                      |
| 36  | Glycine               | 3.56(s)                   | CH <sub>2</sub>                                         |

|    |                         |                           |                                        |
|----|-------------------------|---------------------------|----------------------------------------|
| 37 | Glycerol                | 3.57(m);3.62(m);3.79(m)   | CH <sub>2</sub> ; CH <sub>2</sub> ; CH |
| 39 | N,N-Dimethylglycine     | 2.92(s) 3.73(s)           |                                        |
| 40 | Serine                  | 3.83(dd); 3.96(m)         | CH; CH <sub>2</sub>                    |
| 41 | Phosphocreatine         | 3.93(s)                   | CH <sub>2</sub>                        |
| 43 | Adenosine monophosphate | 4.03(m); 4.37(m)          | O-CH <sub>2</sub> ; CH; 66.92          |
| 44 | Inosine                 | 4.28(dd); 8.22(s)         | CH(5); N-CH=N                          |
| 45 | Adenosine               | 4.30(dd);8.26(s); 8.35(s) | CH(5); N-CH=N                          |
| 46 | β-Glucose               | 4.64(d)                   |                                        |
| 47 | α-Glucose               | 5.24(d)                   |                                        |
| 48 | Allantoin               | 5.39(s)                   | CH                                     |
| 49 | Uracil                  | 5.80(d); 7.53(d) CH(5)    | CH(6)                                  |
| 50 | Uridine                 | 5.90(d); 7.87(d)          | CH(10); CH(11)                         |
| 51 | NADP+                   | 6.05(d);6.15(d)           | CH(32); CH(2)                          |
| 54 | Tyrosine                | 6.89(d); 7.19(d)          | m-CH; o-CH                             |
| 58 | Phenylalanine ;         | 7.33(d); 7.38(t)          | β-CH'; o-CH; p-CH                      |
| 59 | Xanthine                | 7.93(s)                   | CH(2);CH(9)                            |

s: singlet, d: doublet, t: triplet, q: quartet, m: multiplet, dd: doublet of doublet.

**Table S2** Peak attribution of the main marked metabolites in <sup>1</sup>H-NMR spectra of liver sample

| NO. | Metabolites           | δ1H/ppm                 | Moieties                                              |
|-----|-----------------------|-------------------------|-------------------------------------------------------|
| 1   | Isoleucine            | 0.94(t); 1.01(d)        | δ-CH <sub>3</sub> ; β-CH <sub>3</sub>                 |
| 2   | Leucine               | 0.96(t); 1.70(m)        | CH <sub>3</sub> ; CH <sub>2</sub> &γ-CH               |
| 3   | Valine                | 0.99(d); 1.04(d)        | γ-CH <sub>3</sub> ; γ-CH <sub>3</sub>                 |
| 4   | 3-Hydroxybutyrate     | 1.21(d)                 | γCH <sub>3</sub>                                      |
| 6   | Lactate               | 1.33(d); 4.11(q)        | CH <sub>3</sub> ; CH                                  |
| 7   | Alanine               | 1.48(d); 3.78(q)        | CH <sub>3</sub> ; CH                                  |
| 8   | Lysine                | 1.73(m), 3.02(t)        | βCH <sub>2</sub> ,δCH <sub>2</sub>                    |
| 10  | Acetate               | 1.92(s)                 | CH <sub>3</sub>                                       |
| 11  | Glutamate             | 2.05(m)                 | β-CH                                                  |
| 12  | Glutamine             | 2.13(m),3.77(t)         | βCH <sub>2</sub> ,γCH <sub>2</sub>                    |
| 14  | Glutathione           | 2.16 (m),2.55 (m)       | β-CH <sub>2</sub> ; γ-CH <sub>2</sub>                 |
| 15  | Succinate             | 2.41(s)                 | CH                                                    |
| 18  | Dimethylamine         | 2.72 (s)                | CH <sub>3</sub>                                       |
| 20  | N-methylhydantoin     | 2.92 (s),4.08 (s)       | CH <sub>3</sub> ,CH <sub>2</sub>                      |
| 24  | Ethanolamine          | 3.13 (d)                | CH <sub>2</sub>                                       |
| 25  | Choline               | 3.20(s);3.52(m);4.07(m) | CH <sub>3</sub> ;N-CH <sub>2</sub> ;O-CH <sub>2</sub> |
| 26  | Phosphocholine        | 3.22(s);3.59(m);        | CH <sub>3</sub> ; N-CH <sub>2</sub> ;                 |
| 27  | Phosphoethanolamine   | 3.23(t);                | NCH <sub>2</sub> ;                                    |
| 28  | Glycerophosphocholine | 3.68(m);                | N-CH <sub>2</sub> &HO-CH <sub>2</sub> ;               |
| 30  | Betaine               | 3.27(s); 3.89(s)        | CH <sub>3</sub> ; CH <sub>2</sub>                     |
| 33  | Inositol              | 3.28(t);3.54(dd);       | CH(2); CH(4, 6);                                      |
| 36  | Glycine               | 3.56 (s)                | CH <sub>2</sub>                                       |
| 37  | Glycerol              | 3.64 (m); 3.77 (m)      | CH <sub>2</sub> ; CH                                  |
| 38  | Glycogen              | 3.40(m)                 | 1-CH                                                  |

|    |                   |                                         |                             |
|----|-------------------|-----------------------------------------|-----------------------------|
| 42 | Glucaric acid     | 3.95(t)                                 | CH(8)                       |
| 46 | $\beta$ -glucose  | 4.63 (d)                                | 1-CH                        |
| 47 | $\alpha$ -glucose | 5.23 (d)                                | 1-CH                        |
| 48 | Allantoin         | 5.39(s)                                 | CH                          |
| 49 | Uracil            | 5.80(d); 7.53(d)                        | CH(5); CH(6)                |
| 50 | Uridine           | 5.91(d);7.87(d)                         | CH(2);CH(11)                |
| 52 | Cytidine          | 6.06(d); 7.84(d)                        | CH(2); CH(11)               |
| 53 | Fumarate          | 6.52(s)                                 | CH                          |
| 54 | Tyrosine          | 6.89(d); 7.19(d)                        | m-CH; o-CH                  |
| 56 | Tryptophan        | 7.19(m);7.31(s);7.60(m);                | CH(8);CH(6);CH(7)           |
| 57 | Nicotinamide      | 7.59(dd);8.24(dd);8.72(d<br>d); 8.94(s) | CH(5);CH(4);CH(6);<br>CH(2) |
| 60 | Hypoxanthine      | 8.19(s); 8.21(s)                        | CH(2); CH(7)                |
| 61 | Formate           | 8.46(s)                                 | CH                          |

s: singlet, d: doublet, t: triplet, q: quartet, m: multiplet, dd: doublet of doublet.

**Table S3** Peak attribution of the main marked metabolites in  $^1\text{H-NMR}$  spectra of kidney sample

| NO. | Metabolites            | $\delta\text{1H/ppm}$   | Moieties                                               |
|-----|------------------------|-------------------------|--------------------------------------------------------|
| 1   | Isoleucine             | 0.94(t)                 | $\delta$ -CH <sub>3</sub>                              |
| 2   | Leucine                | 0.96(t);1.70(m)         | CH <sub>3</sub> ;CH <sub>2</sub> & $\gamma$ -CH        |
| 3   | Valine                 | 0.99(d);1.04(d)         | $\gamma$ -CH <sub>3</sub> ; $\gamma$ -CH' <sub>3</sub> |
| 4   | 3-Hydroxybutyrate      | 1.21(d)                 | $\gamma$ CH <sub>3</sub>                               |
| 6   | Lactate                | 1.33(d); 4.11(q)        | CH <sub>3</sub> ; CH                                   |
| 7   | Alanine                | 1.48(d); 3.78(q)        | CH <sub>3</sub> ;CH                                    |
| 8   | Lysine                 | 1.73(m), 3.02(t)        | $\beta$ CH <sub>2</sub> , $\delta$ CH <sub>2</sub>     |
| 9   | Ornithine              | 1.73(m)                 | $\delta$ CH <sub>2</sub>                               |
| 10  | Acetate                | 1.92(s)                 | CH <sub>3</sub>                                        |
| 11  | Glutamate              | 2.05(m)                 | $\beta$ -CH                                            |
| 12  | Glutamine              | 2.13(m);3.77(t)         | $\beta$ CH <sub>2</sub> ; $\gamma$ CH <sub>2</sub>     |
| 13  | Methionine             | 2.14(s) ;2.65(t)        | $\gamma$ CH <sub>2</sub> ;S-CH <sub>3</sub>            |
| 14  | Glutathione            | 2.16 (m);2.55 (m)       | $\beta$ -CH <sub>2</sub> ; $\gamma$ -CH <sub>2</sub>   |
| 15  | Succinate              | 2.41(s)                 | CH                                                     |
| 16  | Citrate (M)            | 2.54(d);2.67(d)         | CH <sub>2</sub> ;CH <sub>2</sub>                       |
| 17  | Aspartate              | 2.69(dd);2.82(dd)       | $\beta$ CH <sub>2</sub> ; $\beta$ CH <sub>2</sub>      |
| 18  | Dimethylamine          | 2.72 (s)                | CH <sub>3</sub>                                        |
| 21  | Asparagine             | 2.88(dd);2.96(dd)       | $\beta$ CH <sub>2</sub> ; $\beta$ CH <sub>2</sub>      |
| 22  | Creatine               | 3.04(s);3.94(s)         | CH <sub>3</sub> ,CH <sub>2</sub>                       |
| 23  | Creatinine             | 3.05(s);4.06(s)         | CH <sub>3</sub> ;CH <sub>2</sub>                       |
| 24  | Ethanolamine           | 3.13 (d)                | CH <sub>2</sub>                                        |
| 25  | Choline                | 3.20(s);3.52(m);4.07(m) | CH <sub>3</sub> ;N-CH <sub>2</sub> ;O-CH <sub>2</sub>  |
| 26  | Phosphocholine         | 3.22(s);3.59(m)         | CH <sub>3</sub> ; N-CH <sub>2</sub> ;                  |
| 28  | Glycerophosphocholine  | 3.68(m)                 | N-CH <sub>2</sub> &HO-CH <sub>2</sub>                  |
| 30  | Betaine                | 3.27(s); 3.89(s)        | CH <sub>3</sub> ; CH <sub>2</sub>                      |
| 31  | Trimethylamine-N-oxide | 3.27(s)                 | CH <sub>3</sub>                                        |

|    |                 |                                     |                                      |
|----|-----------------|-------------------------------------|--------------------------------------|
| 32 | Taurine         | 3.27(t);3.42(t)                     | S-CH <sub>2</sub> ;N-CH <sub>2</sub> |
| 33 | Inositol        | 3.28(t);3.54(dd)                    | CH(2); CH(4, 6);                     |
| 35 | Scyllo-Inositol | 3.37(s)                             | CH                                   |
| 36 | Glycine         | 3.56 (s)                            | CH <sub>2</sub>                      |
| 37 | Glycerol        | 3.64 (m); 3.77 (m)                  | CH <sub>2</sub> ;CH                  |
| 45 | Adenosine       | 4.45(t);6.10(d);8.25(s);8.35(s)     | 3-C'H;1-C'H;8-CH;2-CH                |
| 46 | β-glucose       | 4.63 (d)                            | 1-CH                                 |
| 47 | α-glucose       | 5.23 (d)                            | 1-CH                                 |
| 48 | Allantoin       | 5.39(s)                             | CH                                   |
| 49 | Uracil          | 5.80(d); 7.53(d)                    | CH(5); CH(6)                         |
| 50 | Uridine         | 5.91(d);7.87(d)                     | CH(2);CH(11)                         |
| 52 | Cytidine        | 6.06(d); 7.84(d)                    | CH(2); CH(11)                        |
| 53 | Fumarate        | 6.52(s)                             | CH                                   |
| 54 | Tyrosine        | 6.89(d); 7.19(d)                    | m-CH; o-CH                           |
| 55 | Histidine       | 7.11(s), 7.92(s)                    | 2-CH, 4-CH                           |
| 57 | Nicotinamide    | 7.59(dd);8.24(dd);8.72(dd); 8.94(s) | CH(5);CH(4);CH(6);CH(2)              |
| 59 | Xanthine        | 7.93(s)                             | CH                                   |
| 60 | Hypoxanthine    | 8.19(s); 8.21(s)                    | CH(2); CH(7)                         |
| 61 | Formate         | 8.46(s)                             | CH                                   |

s: singlet, d: doublet, t: triplet, q: quartet, m: multiplet, dd: doublet of doublet.

**Table S4** Relative content in control, model and treatment group

| Metabolites       |          | Stomach |         |         | Liver   |         |         | Kindey  |         |         |
|-------------------|----------|---------|---------|---------|---------|---------|---------|---------|---------|---------|
|                   |          | 1day    | 4days   | 7days   | 1day    | 4days   | 7days   | 1day    | 4days   | 7days   |
| <b>Isoleucine</b> | Control  | 0.00271 | 0.00374 | N       | 0.00241 | N       | 0.00157 | 0.00758 | 0.00106 | N       |
|                   | GU model | 0.00222 | 0.00523 | N       | 0.00174 | N       | 0.00094 | 0.00548 | 0.00047 | N       |
|                   | EA       | 0.00204 | 0.00654 | N       | 0.0028  | N       | 0.00227 | 0.00781 | 0.00117 | N       |
| <b>Leucine</b>    | Control  | 0.00719 | 0.01032 | N       | 0.00501 | N       | 0.00433 | 0.01477 | 0.00159 | 0.01306 |
|                   | GU model | 0.00591 | 0.01727 | N       | 0.00388 | N       | 0.00283 | 0.01106 | 0.00133 | 0.01508 |
|                   | EA       | 0.00534 | 0.0167  | N       | 0.00598 | N       | 0.00555 | 0.01478 | 0.00172 | 0.01707 |
| <b>Valine</b>     | Control  | 0.00274 | 0.004   | N       | 0.00316 | N       | 0.00085 | 0.00819 | N       | 0.0044  |
|                   | GU model | 0.00221 | 0.00532 | N       | 0.00248 | N       | 0.00052 | 0.00692 | N       | 0.00529 |
|                   | EA       | 0.00193 | 0.00706 | N       | 0.00364 | N       | 0.00104 | 0.00817 | N       | 0.0062  |
| <b>Glycerol</b>   | Control  | 0.00644 | 0.01694 | 0.00687 | 0.01484 | 0.00772 | 0.00639 | 0.00529 | 0.01065 | 0.00255 |
|                   | GU model | 0.00581 | 0.01067 | 0.00798 | 0.01665 | 0.01154 | 0.00892 | 0.00639 | 0.01143 | 0.00219 |
|                   | EA       | 0.00617 | 0.01712 | 0.00787 | 0.01456 | 0.00746 | 0.00585 | 0.0053  | 0.01037 | 0.0019  |
| <b>Glutamine</b>  | Control  | 0.00501 | N       | N       | 0.01484 | 0.00443 | 0.0141  | 0.00682 | 0.00399 | 0.01076 |
|                   | GU model | 0.00413 | N       | N       | 0.01665 | 0.00609 | 0.0164  | 0.00541 | 0.00332 | 0.01123 |
|                   | EA       | 0.00409 | N       | N       | 0.01456 | 0.00501 | 0.01501 | 0.00609 | 0.00439 | 0.01199 |
| <b>Glutamate</b>  | Control  | 0.00398 | N       | N       | 0.00159 | N       | 0.00147 | N       | N       | N       |
|                   | GU model | 0.00364 | N       | N       | 0.0013  | N       | 0.00096 | N       | N       | N       |
|                   | EA       | 0.00372 | N       | N       | 0.00158 | N       | 0.00157 | N       | N       | N       |

|                      |          |         |         |         |         |         |         |         |         |         |
|----------------------|----------|---------|---------|---------|---------|---------|---------|---------|---------|---------|
| <b>Tyrosine</b>      | Control  | 0.00124 | 0.0018  | N       | 0.00095 | N       | N       | N       | N       | N       |
|                      | GU model | 0.00100 | 0.00276 | N       | 0.00070 | N       | N       | N       | N       | N       |
|                      | EA       | 0.00090 | 0.00284 | N       | 0.00102 | N       | N       | N       | N       | N       |
| <b>Choline</b>       | Control  | N       | N       | N       | 0.00646 | 0.00655 | N       | 0.00486 | 0.00319 | 0.02454 |
|                      | GU model | N       | N       | N       | 0.00716 | 0.00345 | N       | 0.00595 | 0.00395 | 0.01856 |
|                      | EA       | N       | N       | N       | 0.00629 | 0.00435 | N       | 0.00516 | 0.00309 | 0.01844 |
| <b>Alanine</b>       | Control  | N       | N       | N       | 0.01484 | 0.01099 | 0.0141  | 0.01567 | 0.00241 | 0.01076 |
|                      | GU model | N       | N       | N       | 0.01665 | 0.01315 | 0.0164  | 0.01353 | 0.00191 | 0.01123 |
|                      | EA       | N       | N       | N       | 0.01456 | 0.01108 | 0.01501 | 0.01676 | 0.00255 | 0.01199 |
| <b>Glycine</b>       | Control  | N       | N       | N       | 0.01141 | 0.00621 | N       | 0.00334 | 0.01987 | N       |
|                      | GU model | N       | N       | N       | 0.01238 | 0.00958 | N       | 0.00461 | 0.02201 | N       |
|                      | EA       | N       | N       | N       | 0.01113 | 0.00658 | N       | 0.00385 | 0.0199  | N       |
| <b>Betaine</b>       | Control  | N       | N       | N       | 0.0051  | 0.00215 | 0.00462 | 0.00197 | 0.00249 | 0.00267 |
|                      | GU model | N       | N       | N       | 0.00639 | 0.00321 | 0.00801 | 0.00243 | 0.00289 | 0.00243 |
|                      | EA       | N       | N       | N       | 0.00537 | 0.00202 | 0.00445 | 0.00216 | 0.00223 | 0.00227 |
| <b>Serine</b>        | Control  | 0.00421 | 0.00355 | 0.00498 | N       | N       | N       | N       | N       | N       |
|                      | GU model | 0.00496 | 0.00434 | 0.00592 | N       | N       | N       | N       | N       | N       |
|                      | EA       | 0.00593 | 0.00542 | 0.00626 | N       | N       | N       | N       | N       | N       |
| <b>Taurine</b>       | Control  | 0.00085 | 0.00368 | N       | N       | N       | N       | N       | N       | N       |
|                      | GU model | 0.0016  | 0.00164 | N       | N       | N       | N       | N       | N       | N       |
|                      | EA       | 0.00195 | 0.00205 | N       | N       | N       | N       | N       | N       | N       |
| <b>Phenylalanine</b> | Control  | 0.00157 | 0.00206 | N       | N       | N       | N       | N       | N       | N       |
|                      | GU model | 0.00117 | 0.00357 | N       | N       | N       | N       | N       | N       | N       |
|                      | EA       | 0.00105 | 0.00357 | N       | N       | N       | N       | N       | N       | N       |
| <b>Inositol</b>      | Control  | N       | N       | N       | 0.01141 | N       | N       | N       | N       | N       |
|                      | GU model | N       | N       | N       | 0.01238 | N       | N       | N       | N       | N       |
|                      | EA       | N       | N       | N       | 0.01113 | N       | N       | N       | N       | N       |
| <b>Succinate</b>     | Control  | N       | N       | N       | 0.00152 | 0.00079 | N       | N       | N       | N       |
|                      | GU model | N       | N       | N       | 0.00092 | 0.00128 | N       | N       | N       | N       |
|                      | EA       | N       | N       | N       | 0.00112 | 0.00118 | N       | N       | N       | N       |
| <b>Methionine</b>    | Control  | N       | N       | N       | N       | N       | N       | 0.00682 | 0.00096 | N       |
|                      | GU model | N       | N       | N       | N       | N       | N       | 0.00541 | 0.00073 | N       |
|                      | EA       | N       | N       | N       | N       | N       | N       | 0.00609 | 0.00107 | N       |
| <b>Glycerophosp</b>  | Control  | N       | N       | N       | N       | N       | N       | 0.00132 | 0.00508 | 0.00148 |
|                      | GU model | N       | N       | N       | N       | N       | N       | 0.00163 | 0.00537 | 0.00133 |
|                      | EA       | N       | N       | N       | N       | N       | N       | 0.00134 | 0.00495 | 0.00116 |
| <b>hocholine</b>     | Control  | N       | N       | N       | N       | N       | N       | 0.00243 | 0.00106 | N       |
|                      | GU model | N       | N       | N       | N       | N       | N       | 0.00147 | 0.00047 | N       |
|                      | EA       | N       | N       | N       | N       | N       | N       | 0.00169 | 0.00131 | N       |
| <b>Ethanolamine</b>  | Control  | N       | N       | N       | N       | N       | N       | 0.00405 | 0.00378 | 0.00222 |
|                      | GU model | N       | N       | N       | N       | N       | N       | 0.00693 | 0.00427 | 0.00193 |
|                      | EA       | N       | N       | N       | N       | N       | N       | 0.00483 | 0.00363 | 0.00182 |
| <b>Phosphorylcho</b> | Control  | N       | N       | N       | N       | N       | N       | 0.00591 | 0.00445 | 0.00689 |
|                      | GU model | N       | N       | N       | N       | N       | N       | 0.00706 | 0.00487 | 0.00815 |

|                 |          |   |   |   |   |   |   |         |         |         |
|-----------------|----------|---|---|---|---|---|---|---------|---------|---------|
| <b>line</b>     | EA       | N | N | N | N | N | N | 0.00614 | 0.00426 | 0.0075  |
| <b>Ornithin</b> | Control  | N | N | N | N | N | N | 0.00656 | N       | 0.00441 |
|                 | GU model | N | N | N | N | N | N | 0.00515 | N       | 0.00519 |
|                 | EA       | N | N | N | N | N | N | 0.00631 | N       | 0.00572 |

Red color: content increase, blue color: content decrease, N: no statistical significance.

**Table S5** Relative content in different treatment group over time

| Metabolites   | Stomach |         |         | Liver   |         |         | Kindey  |         |         |
|---------------|---------|---------|---------|---------|---------|---------|---------|---------|---------|
|               | EA1     | EA2     | EA3     | EA1     | EA2     | EA3     | EA1     | EA2     | EA3     |
| Isoleucine    | 0.00252 | 0.00635 | 0.00326 | 0.0028  | 0.00432 | 0.0025  | N       | N       | N       |
| Leucine       | 0.00534 | 0.0167  | 0.00679 | 0.00789 | 0.01032 | 0.00717 | N       | N       | N       |
| Valine        | 0.00279 | 0.00857 | 0.00331 | 0.00364 | 0.00524 | 0.00326 | N       | N       | N       |
| Alanine       | N       | N       | N       | 0.00904 | 0.00839 | 0.00815 | 0.00831 | 0.01037 | 0.01057 |
| Betaine       | N       | N       | N       | 0.00537 | 0.00363 | 0.00458 | 0.00224 | 0.00189 | 0.00227 |
| Choline       | N       | N       | N       | 0.00629 | 0.00435 | 0.00554 | 0.00143 | 0.00089 | 0.00091 |
| Glutamate     | 0.00178 | 0.00286 | 0.00228 | 0.00158 | 0.00226 | 0.00191 | N       | N       | N       |
| Glutamine     | 0.00409 | 0.0069  | 0.00387 | 0.00904 | 0.00839 | 0.00815 | 0.00157 | 0.00192 | 0.00162 |
| Glycerol      | 0.00803 | 0.00967 | 0.00736 | 0.00303 | 0.00149 | 0.00238 | 0.00814 | 0.0119  | 0.01199 |
| Glycine       | N       | N       | N       | 0.00748 | 0.00605 | 0.00707 | N       | N       | N       |
| Inositol      | N       | N       | N       | 0.00626 | 0.00447 | 0.00593 | N       | N       | N       |
| Methionine    | N       | N       | N       | N       | N       | N       | 0.00576 | 0.00646 | 0.00785 |
| Phenylalanine | 0.00105 | 0.00357 | 0.00122 | N       | N       | N       | N       | N       | N       |
| Serine        | 0.00641 | 0.00448 | 0.00626 | N       | N       | N       | N       | N       | N       |
| Succinate     | N       | N       | N       | 0.00067 | 0.00118 | 0.00068 | N       | N       | N       |
| Taurine       | 0.00637 | 0.00205 | 0.00382 | N       | N       | N       | N       | N       | N       |
| Tyrosine      | 0.00080 | 0.00284 | 0.00119 | N       | N       | N       | N       | N       | N       |

Red color: content increase, blue color: content decrease, N: no statistical significance.

**Table S6**  $p$  (CV-ANOVA) indicating the model quality of OPLS-DA

|               |    |         | $p$ (CV-ANOVA) |           |            |
|---------------|----|---------|----------------|-----------|------------|
| OPLS-DA model |    |         | stomach        | liver     | kidney     |
| GU model vs.  | 1d | control | 0.0350044      | 0.150404  | 0.00910267 |
|               |    | EA      | 0.392812       | 0.0389342 | 0.0802677  |
|               | 4d | control | 0.342957       | 0.0836458 | 0.0759741  |
|               |    | EA      | 0.000071       | 0.0291931 | 0.00442573 |
|               | 7d | control | 0.439592       | 0.205449  | 0.0171049  |
|               |    | EA      | 0.339974       | 0.0188815 | 0.0460066  |
